# Supplementary material
Source: PubMed Central journal article supplement (PMC3809896)
Supplement: NIHMS514366-supplement-Supplementary_Information.pdf [file NIHMS514366-supplement-Supplementary_Information.pdf]

## **Chitin Nanofiber Micropatterned Flexible Substrates for Tissue Engineering<sup>†</sup>**

Pegah Hassanzadeh,<sup>‡a</sup> Mahshid Kharaziha,<sup>‡b,c</sup> Mehdi Nikkhah,<sup>b,c</sup> Su Ryon Shin,<sup>b,c,d</sup> Jungho Jin,<sup>a</sup> Simeiqi He,<sup>a</sup> Wei Sun,<sup>a</sup> Chao Zhong,<sup>a</sup> Mehmet R. Dokmeci,<sup>b,c,d</sup> Ali Khademhosseini,<sup>\*b,c,d</sup> and Marco Rolandi<sup>\*a</sup>

<sup>a</sup> Department of Materials Science and Engineering, University of Washington, Seattle, WA, 98195, USA,

<sup>b</sup> Center for Biomedical Engineering, Department of Medicine, Brigham and Women's Hospital, Harvard Medical School, Boston, MA 02115, USA

<sup>c</sup> Harvard-MIT Division of Health Sciences and Technology, Massachusetts Institute of Technology, Cambridge, MA 02139, USA

<sup>d</sup> Wyss Institute for Biologically Inspired Engineering, Harvard University, Boston, MA 02115, USA

\* E-mail: [alik@rics.bwh.harvard.edu](mailto:alik@rics.bwh.harvard.edu), [rolandi@uw.edu](mailto:rolandi@uw.edu)

‡ These authors contributed equally to this work.

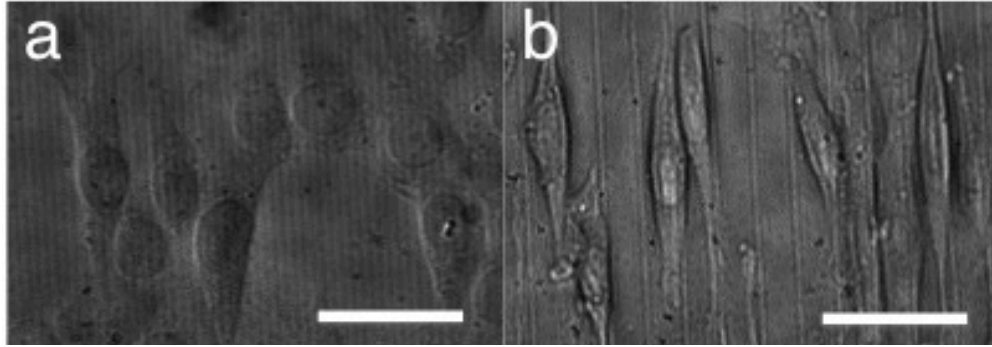

**Fig. S1:** Phase contrast Images of the cells attached on (a) G1 and (b) G2 micropatterned substrates after 5 days of culture. Scale bars represent 50  $\mu$  m.

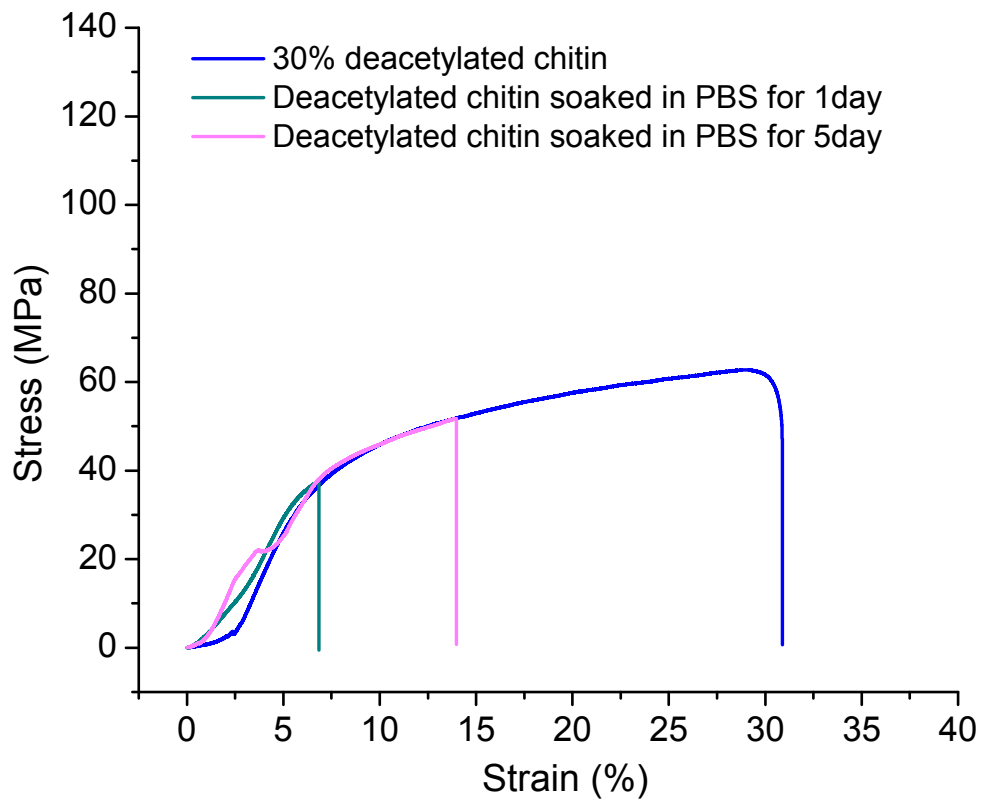

**Fig. S2:** Tensile test on 30% deacetylated chitin substrates dry and after immersion in PBS for 1 day and for 5 days.
